# Supplementary material for: The structural analysis of the pro-oxidant copper-binding site of denatured apo-H43R SOD1 and the elucidation of the origin of the acquisition of the pro-oxidant activity
Source: Royal Society of Chemistry journal article supplement (doi:10.1039/c5cp07729j), 2016-01-01
Supplement: c5cp07729j1.pdf [file c5cp07729j1.pdf]

# The structural analysis of the pro-oxidant copper-binding site of denatured apo-H43R SOD1 and the elucidation of the origin of acquisition of the pro-oxidant activity

Nobuhiro Fujimaki\*, Takashi Miura, Takakazu Nakabayashi\*

Graduate School of Pharmaceutical Sciences, Tohoku University, Aoba-ku, Sendai 980-8578, Japan

\* Correspondence author. Fax: +81 22 795 6855.

*E-mail address:* nobuhiro.fujimaki.p1@dc.tohoku.ac.jp (N. Fujimaki),

takan@m.tohoku.ac.jp (T. Nakabayashi).

## Supporting Information for Review Only

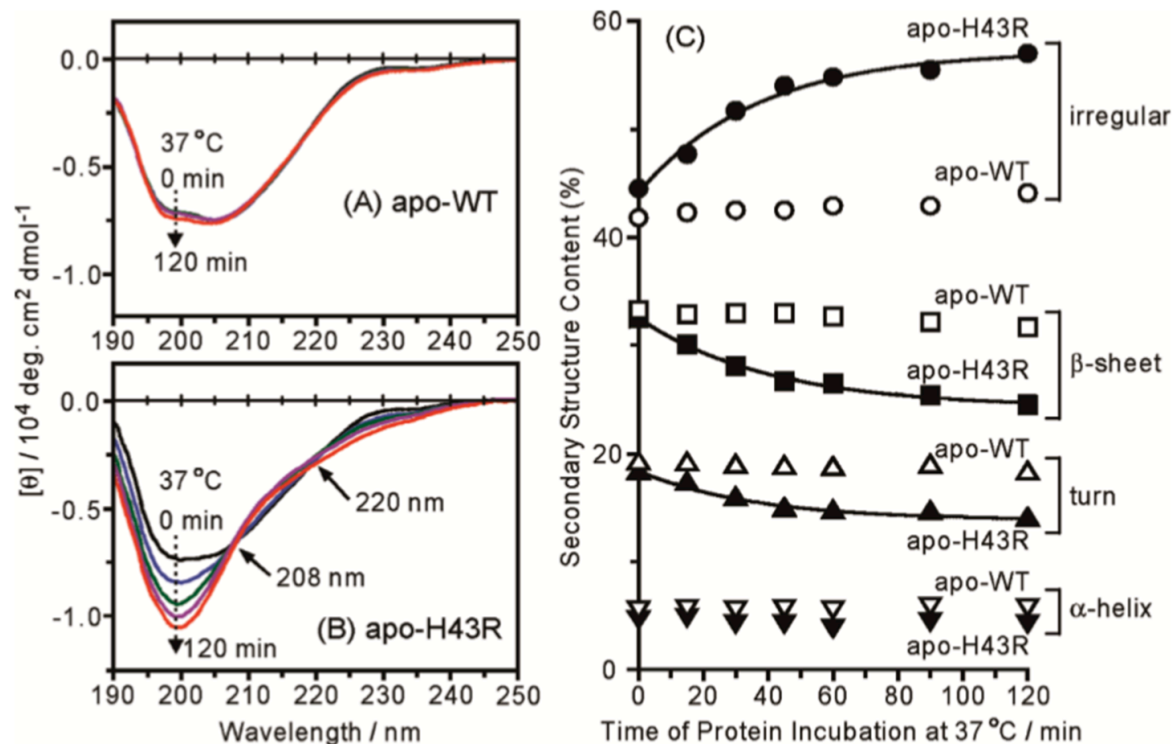

**Figure S1.** CD spectral and secondary structural changes during the incubation of SOD1 at 37 °C: (A) CD spectral change of apo-WT, (B) CD spectral change of apo-H43R, and (C) changes in secondary structure content calculated from the CD spectra for apo-WT (empty symbols) and apo-H43R (filled symbols). The spectra were recorded after incubation at 37°C for 0 (no incubation), 15, 30, 45, 60, 90, and 120 min, but those at 45 and 90 min are not shown in panels A and B for the sake of clarity. Reprinted with permission from ref. 25. Copyright 2011, American Chemical Society.

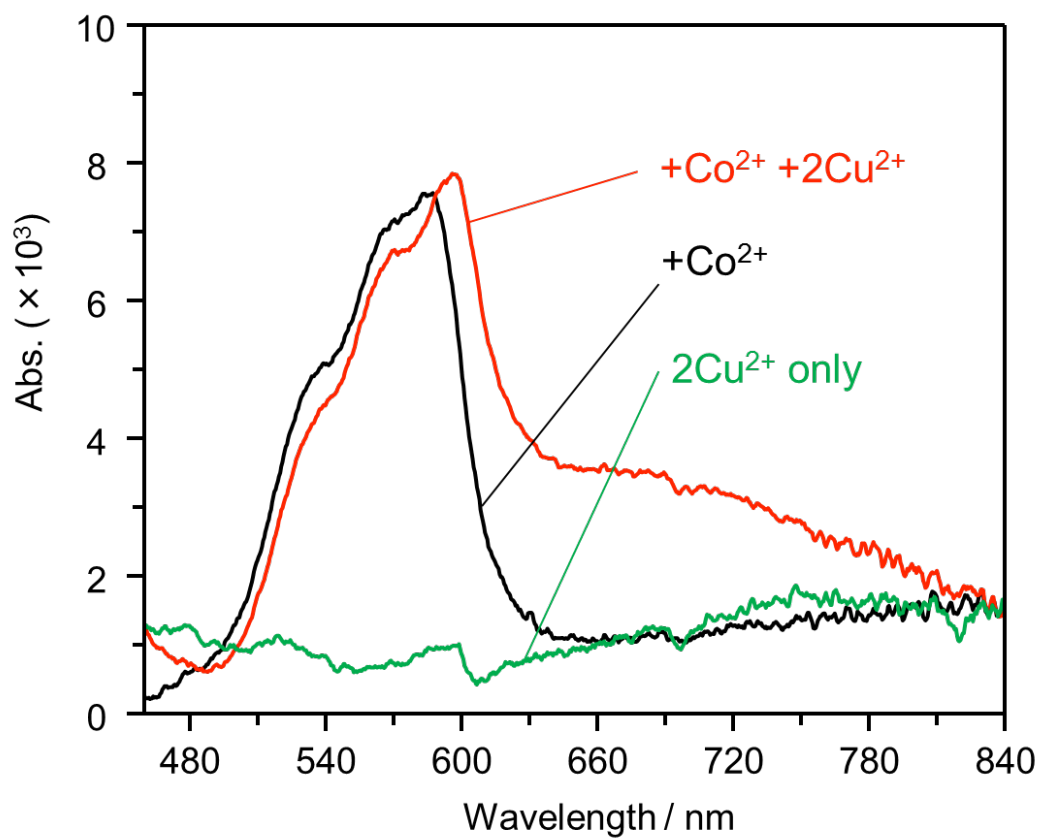

**Figure S2.** Effect of the addition of Cu<sup>2+</sup> on the d–d absorption spectra of Co<sup>2+</sup>-bound native apo-H43R in phosphate buffer. The concentrations were 18 μM in monomer units (native apo-H43R), 18 μM (CoCl<sub>2</sub>) and 36 μM (CuCl<sub>2</sub>). The spectra were measured by the addition of 1 equiv. Co<sup>2+</sup> (black line) and 2 equiv. Cu<sup>2+</sup> after 1 equiv. Co<sup>2+</sup> (red line). The absorption spectrum of CuCl<sub>2</sub> (36 μM) in phosphate buffer without apo-H43R (green) is also shown for comparison.

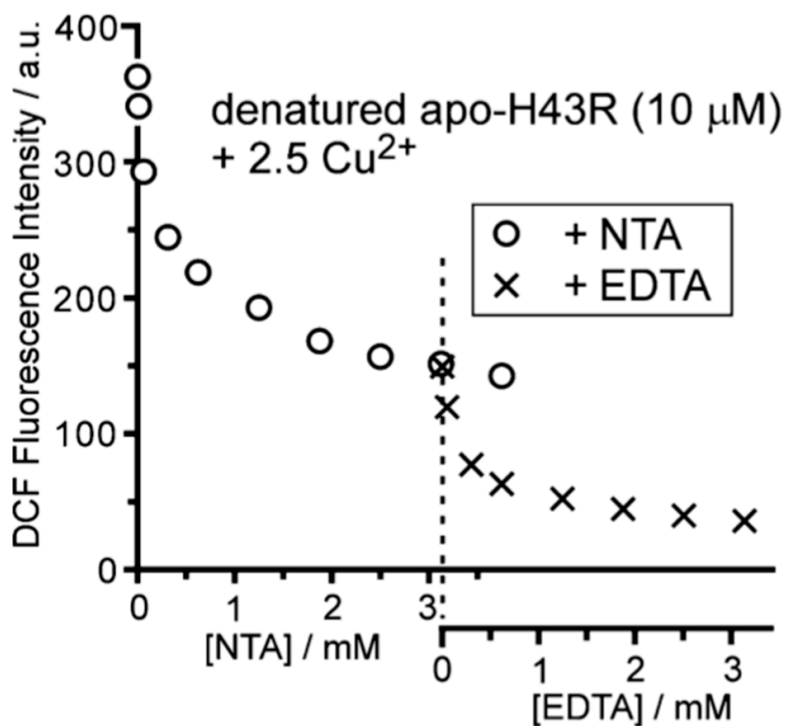

**Figure S3.** Effect of  $\text{Cu}^{2+}$  depletion on the pro-oxidant activity of  $\text{Cu}^{2+}$ -bound denatured apo-H43R. The pro-oxidant activity was measured as the fluorescence intensity from DCF produced by the oxidation of DCFH (50  $\mu\text{M}$ ) in the presence of denatured apo-H43R (10  $\mu\text{M}$ ),  $\text{CuCl}_2$  (10  $\mu\text{M}$ ),  $\text{H}_2\text{O}_2$  (50  $\mu\text{M}$ ), and one or two chelators (NTA and/or EDTA, 0–6.2 mM). The DCF fluorescence was excited at 495 nm and observed at 523 nm. NTA was added first and then EDTA was added. Reprinted with permission from ref. 26. Copyright 2013, American Chemical Society.
