# Supplementary material for: The structural analysis of the pro-oxidant copper-binding site of denatured apo-H43R SOD1 and the elucidation of the origin of the acquisition of the pro-oxidant activity
Source: Royal Society of Chemistry journal article supplement (doi:10.1039/c5cp07729j), 2016-01-01
Supplement: c5cp07729j2.pdf [file c5cp07729j2.pdf]

## Electronic Supplementary Information

### The structural analysis of the pro-oxidant copper-binding site of denatured apo-H43R SOD1 and the elucidation of the origin of acquisition of the pro-oxidant activity

Nobuhiro Fujimaki, Takashi Miura and Takakazu Nakabayashi

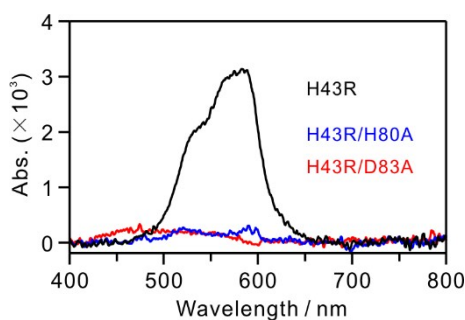

**Figure 1S.** The d-d absorption spectra of  $\text{Co}^{2+}$  bound to denatured apo-H43R, apo-H43R/H80A, and apo-H43R/D83A. Denatured apo-SOD1 (18  $\mu\text{M}$ ) was mixed with  $\text{Co}^{2+}$  (18  $\mu\text{M}$ ) in 50 mM phosphate buffer (pH 7.4).
